1  
2  
3  
4  
5  
6  
7  
8  
9  
10  
11  
12  
13  
14  
15  
16  
17  
18  
19  
20  
21  
22  
23  
24  
25  
26  
27  
28  
29  
30  
31  
32  
33  
34  
35  
36  
37  
38  
39  
40  
41  
42  
43  
44  
45  
46  
47

## Latent functional connectivity underlying multiple brain states

Ethan M. McCormick <sup>\*†a,b</sup>, Katelyn L. Arnemann <sup>†a</sup>, Taku Ito <sup>a,c</sup>, Stephen J. Hanson <sup>d</sup>, & Michael W. Cole <sup>a</sup>

<sup>†</sup>denotes equal authorship

<sup>a</sup> Center for Molecular and Behavioral Neuroscience, Rutgers University, Newark, New Jersey; <sup>b</sup> Department of Psychology and Neuroscience, University of North Carolina, Chapel Hill, United States; <sup>c</sup> Yale University School of Medicine, Yale University, New Haven, Connecticut; <sup>d</sup> Rutgers University Brain Imaging Center, Newark, New Jersey.

\*corresponding author  
Ethan M. McCormick  
Center for Molecular and Behavioral Neuroscience,  
Rutgers University  
197 University Avenue, Newark, NJ 07102  
[ethan.mccormick@rutgers.edu](mailto:ethan.mccormick@rutgers.edu)

48  
49  
50  
51  
52  
53  
54  
55  
56  
57  
58  
59  
60  
61  
62  
63  
64  
65  
66

## Abstract

Functional connectivity (FC) studies have predominantly focused on resting state, where ongoing dynamics are thought to primarily reflect the brain’s intrinsic network architecture, which is thought to be broadly relevant to brain function because it persists across brain states. However, it is unknown whether resting state is the optimal state for measuring intrinsic FC. We propose that latent FC, reflecting patterns of connectivity shared across many brain states, may better capture intrinsic FC relative to measures derived from resting state alone. We estimated latent FC in relation to 7 highly distinct task states (24 task conditions) and resting state using fMRI data from 352 participants from the Human Connectome Project. Latent FC was estimated independently for each connection by applying leave-one-task-out factor analysis on the state FC estimates. Compared to resting-state connectivity, we found that latent connectivity improves generalization to held-out brain states, better explaining patterns of both connectivity and task-evoked brain activity. We also found that latent connectivity improved prediction of behavior, measured by the general intelligence factor psychometric *g*. Our results suggest that patterns of FC shared across many brain states, rather than just resting state, better reflects general, state-independent connectivity. This affirms the notion of “intrinsic” brain network architecture as a set of connectivity properties persistent across brain states, providing an updated conceptual and mathematical framework of intrinsic connectivity as a latent factor.

67

## Introduction

68           A major goal in cognitive neuroscience in recent years has been to move away from  
69 characterizing brain activation and connectivity in specific task states towards understanding  
70 “intrinsic” or context-free brain activity. Such activity reflects the more than 95% of metabolic  
71 brain activity that remains unchanged across cognitive demands (Raichle, 2006). This ongoing  
72 brain activity persists across states and is not attributable to external stimuli or task demands.  
73 Efforts to understand intrinsic function have focused primarily on statistical associations between  
74 brain activity time series (functional connectivity; FC) during the resting state (Fox & Raichle,  
75 2007), which has revealed an intrinsic brain functional network architecture that recapitulates  
76 patterns of task-evoked brain activity (Cole, Ito, Bassett, & Schultz, 2016; Smith et al., 2009) and  
77 structural connectivity (Honey et al., 2009). Despite its importance for understanding brain  
78 function, many uncertainties remain on how to best estimate intrinsic FC. While some efforts have  
79 focused on the need to obtain longer resting-state scans (Anderson, Ferguson, Lopez-Larson, &  
80 Yurgelun-Todd, 2011; M. Elliott et al., 2019; Hacker et al., 2013; Laumann et al., 2015) more  
81 recent approaches have highlighted advantages of combining resting-state and task data to analyze  
82 intrinsic activity.

83           This second set of approaches leverages functional data across different task (and rest)  
84 scans in order to improve the reliability of FC estimates and their predictive utility (M. Elliott et  
85 al., 2019) Because of the relatively high stability of FC networks across task states (Cole, Bassett,  
86 Power, Braver, & Petersen, 2014; Gratton et al., 2018; Krienen, Yeo, & Buckner, 2014),  
87 combining data across task runs aims to distinguish what is common across a larger set of brain  
88 states. What is common therefore reflects the intrinsic patterns of covariance in the brain, while  
89 variation between different brain states is treated as noise in the combined data. However, this

90 work largely relies on averaging data from multiple scans together (M. Elliott et al., 2019). While  
91 this approach has been shown to be useful, and has the advantage of simplicity, there are potential  
92 theoretical limitations to such an approach that may limit its generalizability. Given its ubiquity  
93 and close-formed, arithmetic solution, the average is rarely thought of as a formal statistical model.  
94 However, recent work (McNeish & Wolf, 2020) has shown that the average can be thought of as  
95 a restricted case of the more-general factor analytic model. Embedding the average in a  
96 theoretically rich statistical framework is likely to offer advantages for interpretation of results  
97 using this measure as well as insights into the measure itself.

98         Factor analysis has a long tradition in the behavioral sciences (Spearman, 1904; Thurstone,  
99 1935) and is an invaluable tool in psychometrics and psychological measurement. Its key insight  
100 is that observed measures (e.g., behavioral responses or fMRI scans) are imperfect manifestations  
101 of an unobserved (i.e., latent) variable (Bollen, 2002). In the factor model, observed indicators ( $y_{i,t}$ ;  
102  $i$  = individual,  $t$  = task state) are modeled as dependent on the underlying latent factor ( $\eta$ ; Figure  
103 1). Variability in the indicators is partitioned into common variance (transmitted through the factor  
104 loading matrix,  $\Lambda$ ) and unique variance ( $\epsilon_t$ ). In this model, latent FC represents an unmeasured,  
105 underlying brain state that is common to all observed brain states (i.e., the indicators: resting state,  
106 motor task, etc.), but we also explicitly model additional variance that is only found in each  
107 individual task state through the error terms. Factor loadings for the individual task states (e.g.,  $\lambda_{11}$   
108 for Rest) in this single-factor model can be interpreted as the proportion of variance explained in  
109 each task state by latent FC (similar to  $R^2$  in regression).

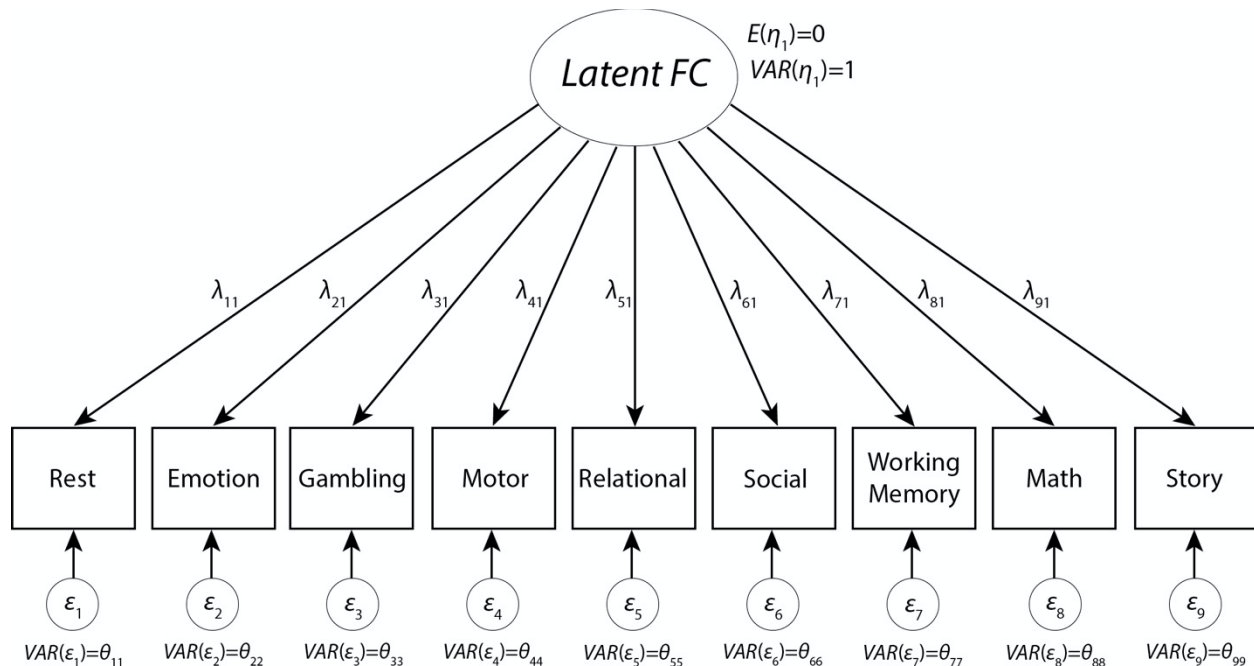

110  
111 **Figure 1. Factor Model.** A set of indicators (e.g., Rest, the Motor task, etc.) are modeled being composed of shared  
112 underlying variance, as represented by the latent factor (i.e., Latent FC), and unique task-state variance (in the  
113 errors). Factor loadings ( $\lambda$ ) represent the percent variance in each task state that is explained by the underlying Latent  
114 FC.

115

116 As can be seen in Figure 1, the factor analysis model of latent FC is a parameter-rich model

117 that allows for differentially weighted relationships between the underlying latent connectivity and

118 measured connectivity in each specific state. What McNeish and Wolf (2020) showed, however,

119 is that the average can be recovered using this model by setting all factor loadings ( $\lambda$ ) equal to 1

120 and the unique variances to 0. This recast of the average as a special case of the factor model not

121 only has the advantage of making the assumptions of the average clearer, but it enables a formal

122 test of those assumptions. For instance, by setting all factor loadings equal, the average assumes

123 that each observed FC state is equally (and positively) related to the underlying latent FC. If we

124 want to relax that assumption, the factor analytic model can be used to compute unique optimally

125 weighted values for each factor loading, which suggests that some observed states may be better

126 (or worse) reflections of underlying latent FC. Indeed, factor loadings may take on negative values,

127 which implies that an observed indicator is anti-correlated with the underlying latent FC. However,  
128 if the assumption of equal, positive weighting is indeed an appropriate assumption, freely  
129 estimated factor loadings will converge towards equal values and approximate the average. In  
130 other words, the flexibility of the full factor loading does not preclude the average, but instead  
131 offers a broader range of possibility for deriving a measure of latent FC in heterogeneous data and  
132 can be used to test the validity of the average FC assumption of equal positive factor loadings  
133 across brain states.

134 Here, we test the reliability of a factor analytic framework for modeling state-general brain  
135 connectivity – “intrinsic” FC that generalizes across a variety of brain states. First, we  
136 hypothesized that latent FC reflects a positive manifold (analogous to the positive correlations  
137 across intelligence tests in general intelligence research; (Kovacs & Conway, 2016)), where all  
138 state-specific connectivity values are positively correlated with each other and so load positively  
139 onto the underlying latent variable. This would confirm that a single common intrinsic functional  
140 network architecture exists across conscious brain states. We further hypothesized that by  
141 combining information across task states, such as in the factor model, a more reliable measure of  
142 “intrinsic” connectivity can be estimated than when using resting state data alone (the current field  
143 standard). This would suggest that resting-state FC is not necessarily the best state for estimating  
144 intrinsic FC, especially if resting state does not load higher on the latent variable than other states.  
145 In testing these hypotheses, we developed an analytic framework for estimating state-general,  
146 latent FC in whole-brain functional data. Using multi-task fMRI data from the Human Connectome  
147 Project (HCP), we compare the ability of latent and resting-state FC to predict task-evoked  
148 activation and task-state FC for held-out brain states, as well as to explain individual differences  
149 in psychometric “g” (a measure of human intelligence derived with a similar factor analytic

150 model). Results demonstrate the promise of the latent variable approach in functional  
151 neuroimaging, particularly for the estimation of intrinsic FC that generalizes beyond specific brain  
152 states (e.g., rest). Finally, we demonstrate the relationship between freely estimated latent FC and  
153 the simpler average FC approach and discuss the theoretical advantages of casting both methods  
154 in the latent variable framework for future work.

155

156

## Methods

157 For clarity, portions of the text in this section are from our prior publication using the same  
158 dataset and some identical analysis procedures: Ito et al. (2020).

### 159 Participants

160 Data in the present study were collected as part of the Washington University-Minnesota  
161 Consortium of the Human Connectome Project (HCP) (Van Essen et al., 2013). A subset of data (  
162  $n = 352$ ) from the HCP 1200 release was used for empirical analyses. Specific details and  
163 procedures of subject recruitment can be found in Van Essen et al. (2020). The subset of 352  
164 participants was selected based on: quality control assessments (i.e., any participants with any  
165 quality control flags were excluded, including 1) focal anatomical anomaly found in T1w and/or  
166 T2w scans, 2) focal segmentation or surface errors, as output from the HCP structural pipeline, 3)  
167 data collected during periods of known problems with the head coil, 4) data in which some of the  
168 FIX-ICA components were manually reclassified; exclusion of high-motion participants  
169 (participants that had any fMRI run in which more than 50% of TRs had greater than 0.25mm  
170 framewise displacement); removal according to family relations (unrelated participants were  
171 selected only, and those with no genotype testing were excluded). A full list of the 352 participants  
172 used in this study will be included as part of the code release.

173 All participants were recruited from Washington University in St. Louis and the  
174 surrounding area. We split the 352 subjects into two cohorts of 176 subjects: an exploratory cohort  
175 (99 women) and a validation cohort (84 women). The exploratory cohort had a mean age of 29  
176 years of age (range=22-36 years of age), and the validation cohort had a mean age of 28 years of  
177 age (range=22-36 years of age). All subjects gave signed, informed consent in accordance with the  
178 protocol approved by the Washington University institutional review board.

### 179 **Scan Acquisition**

180 Whole-brain multiband echo-planar imaging acquisitions were collected on a 32-channel  
181 head coil on a modified 3T Siemens Skyra with TR=720 ms, TE=33.1 ms, flip angle=52°,  
182 Bandwidth=2,290 Hz/Px, in-plane FOV=208x180 mm, 72 slices, 2.0 mm isotropic voxels, with a  
183 multiband acceleration factor of 8. Data for each subject were collected over the span of two days.  
184 On the first day, anatomical scans were collected (including T1-weighted and T2-weighted images  
185 acquired at 0.7 mm isotropic voxels) followed by two resting-state fMRI scans (each lasting 14.4  
186 minutes) and ending with a task fMRI component. The second day consisted of first collecting a  
187 diffusion imaging scan, followed by a second set of two resting-state fMRI scans (each lasting  
188 14.4 minutes), and again ending with a task fMRI session.

189 Each of the seven tasks was collected over two consecutive fMRI runs. The seven tasks  
190 consisted of an emotion cognition task, a gambling reward task, a language task, a motor task, a  
191 relational reasoning task, a social cognition task, and a working memory task. Briefly, the emotion  
192 cognition task required making valence judgements on negative (fearful and angry) and neutral  
193 faces. The gambling reward task consisted of a card guessing game, where subjects were asked to  
194 guess the number on the card to win or lose money. The language processing task consisted of  
195 interleaving two language conditions, which involved answering questions related to a story



196 presented aurally, and a math condition, which involved basic arithmetic questions presented  
197 aurally. Note that we treated the two language task conditions as separate tasks, given the highly  
198 distinct nature of the conditions (other than that they were presented aurally). The motor task  
199 involved asking subjects to either tap their left/right fingers, squeeze their left/right toes, or move  
200 their tongue. The reasoning task involved asking subjects to determine whether two sets of objects  
201 differed from each other in the same dimension (e.g., shape or texture). The social cognition task  
202 was a theory of mind task, where objects (squares, circles, triangles) interacted with each other in  
203 a video clip, and subjects were subsequently asked whether the objects interacted in a social  
204 manner. Lastly, the working memory task was a variant of the N-back task. Further details on the  
205 resting-state fMRI portion can be found in (Smith et al., 2013), and additional details on the task  
206 fMRI components can be found in (Barch et al., 2013) .

#### 207 **Behavior: Data**

208 To assess generalized intelligence (g), we drew 11 measures of cognitive ability from the  
209 HCP dataset, which are derived from the NIH Toolbox for Assessment of Neurological and  
210 Behavioral function (<http://www.nihtoolbox.org>; (Gershon et al., 2013) and the Penn  
211 computerized neurocognitive battery (Gur et al., 2010). Tasks included: picture sequence memory;  
212 dimensional card sort; flanker attention and inhibitory control; the Penn Progressive Matrices; oral  
213 reading recognition; picture vocabulary; pattern completion processing speed; variable short Penn  
214 line orientation test; Penn word memory test (number correct and median reaction time as separate  
215 variables]) and list sorting. For all measures, the age-unadjusted score was used where applicable.  
216 For complete information regarding all measures, see the descriptions in the Cognition Category  
217 of the HCP Data Dictionary

218 (<https://wiki.humanconnectome.org/display/PublicData/HCP+Data+Dictionary+Public->  
219 [+Updated+for+the+1200+Subject+Release](https://wiki.humanconnectome.org/display/PublicData/HCP+Data+Dictionary+Public-+Updated+for+the+1200+Subject+Release)).

## 220 **Behavior: Factor analysis model of psychometric ‘g’**

221 We then derived a general factor of intelligences using a multiple-indicator latent factor  
222 model. We approach the factor model using a confirmatory factor analysis (CFA) approach with a  
223 unitary factor underlying all individual cognitive tasks. Factor loadings were estimated using the  
224 *psych* R package (Revelle, 2017). Factor scores were computed using the regression method  
225 (Thurstone, 1935) to obtain manifest variables for prediction.

## 226 **fMRI: Preprocessing**

227 Minimally preprocessed data for both resting-state and task fMRI were obtained from the  
228 publicly available HCP data. Minimally preprocessed surface data was then parcellated into 360  
229 brain regions using the Glasser atlas (Glasser et al., 2016). We performed additional preprocessing  
230 steps on the parcellated data for resting-state fMRI and task state fMRI to conduct neural  
231 variability and FC analyses. This included removing the first five frames of each run, de-meaning  
232 and de-trending the time series, and performing nuisance regression on the minimally preprocessed  
233 data (Ciric et al., 2017) . Nuisance regression removed motion parameters and physiological noise.  
234 Specifically, six primary motion parameters were removed, along with their derivatives, and the  
235 quadratics of all regressors (24 motion regressors in total). Physiological noise was modeled using  
236 aCompCor on time series extracted from the white matter and ventricles (Behzadi, Restom, Liau,  
237 & Liu, 2007) . For aCompCor, the first 5 principal components from the white matter and  
238 ventricles were extracted separately and included in the nuisance regression. In addition, we  
239 included the derivatives of each of those components, and the quadratics of all physiological noise  
240 regressors (40 physiological noise regressors in total). The nuisance regression model contained a

241 total of 64 nuisance parameters. This was a variant of previously benchmarked nuisance regression  
242 models reported in (Ciric et al., 2017) .

243 We excluded global signal regression (GSR), given that GSR can artificially induce  
244 negative correlations (Murphy, Birn, Handwerker, Jones, & Bandettini, 2009; Power et al., 2014),  
245 which could bias analyses of whether global correlations decrease during task performance. We  
246 included aCompCor as a preprocessing step here given that aCompCor does not include the  
247 circularity of GSR (regressing out some global gray matter signal of interest) while including some  
248 of the benefits of GSR (some extracted components are highly similar to the global signal) (Power  
249 et al., 2018). This logic is similar to a recently-developed temporal-ICA-based artifact removal  
250 procedure that seeks to remove global artifact without removing global neural signals, which  
251 contains behaviorally relevant information such as vigilance (Glasser et al., 2018; Wong, Olafsson,  
252 Tal, & Liu, 2013). We extended aCompCor to include the derivatives and quadratics of each of  
253 the component time series to further reduce artifacts. Code to perform this regression is publicly  
254 available online using python code (version 2.7.15) ([https://github.com/ito-](https://github.com/ito-takuya/fmriNuisanceRegression)  
255 [takuya/fmriNuisanceRegression](https://github.com/ito-takuya/fmriNuisanceRegression)). Following nuisance regression, the time series for each run  
256 (task-state and rest-state) were z-normalized such that variances across runs would be on the same  
257 scale (i.e., unit variance).

258 Task data for task FC analyses were additionally preprocessed using a standard general  
259 linear model (GLM) for fMRI analysis. For each task paradigm, we removed the mean evoked  
260 task-related activity for each task condition by fitting the task timing (block design) for each  
261 condition using a finite impulse response (FIR) model (Cole et al., 2019) . (There were 24 task  
262 conditions across seven cognitive tasks.) We used an FIR model instead of a canonical  
263 hemodynamic response function given recent evidence suggesting that the FIR model reduces both

264 false positives and false negatives in the identification of FC estimates (Cole et al., 2019). This is  
265 due to the FIR model's ability to flexibly fit the mean-evoked response across all blocks.

266 FIR modeled task blocks were modeled separately for task conditions within each of the  
267 seven tasks. In particular, two conditions were fit for the emotion cognition task, where coefficients  
268 were fit to either the face condition or shape condition. For the gambling reward task, one condition  
269 was fit to trials with the punishment condition, and the other condition was fit to trials with the  
270 reward condition. For the language task, one condition was fit for the story condition, and the other  
271 condition was fit to the math condition. For the motor task, six conditions were fit: (1) cue; (2)  
272 right hand trials; (3) left hand trials; (4) right foot trials; (5) left foot trials; (6) tongue trials. For  
273 the relational reasoning task, one condition was fit to trials when the sets of objects were matched,  
274 and the other condition was fit to trials when the objects were not matched. For the social cognition  
275 task, one condition was fit if the objects were interacting socially (theory of mind), and the other  
276 condition was fit to trials where objects were moving randomly. Lastly, for the working memory  
277 task, 8 conditions were fit: (1) 2-back body trials; (2) 2-back face trials; (3) 2-back tool trials; (4)  
278 2-back place trials; (5) 0-back body trials; (6) 0-back face trials; (7) 0-back tool trials; (8) 0-back  
279 place trials. Since all tasks were block designs, each time point for each block was modeled  
280 separately for each task condition (i.e., FIR model), with a lag extending up to 25 TRs after task  
281 block offset.

## 282 **fMRI: Task activation**

283 We performed a task GLM analysis on fMRI task data to estimate evoked brain activity  
284 during task states. The task timing for each of the 24 task conditions was convolved with the SPM  
285 canonical hemodynamic response function to obtain task-evoked activity estimates (Friston et al.,

286 1994). FIR modeling was not used when modeling task-evoked activity. Coefficients were  
287 obtained for each parcel in the Glasser et al. (2016) cortical atlas for each of the 24 task conditions.

### 288 **fMRI: Functional connectivity (FC) estimation**

289 Residual timeseries from the rest and task nuisance regressions were used to estimate  
290 functional connectivity for each task. Connectivity values were estimated using zero-lag Pearson  
291 product-moment correlations. Timeseries were concatenated across separate runs of the same task  
292 to yield a single connectivity value per edge for a given task or resting state condition. For each  
293 task scan, we utilized TRs that corresponded to “on-task” timepoints. For instance, we extracted  
294 TRs from the working memory scan during N-back task blocks, excluding TRs from the inter-  
295 block fixation periods. For the number of TRs included in the connectivity estimates for each  
296 condition and scan state, see Table S1.

### 297 **fMRI: Factor analysis model of latent FC**

298 Factor analysis for obtaining latent FC was conducted with the same approach used to  
299 obtain factor scores for generalized intelligence. FC estimates from each separate fMRI task were  
300 used as indicators on a unitary factor model and factor scores were obtained using the regression  
301 method in the *psych* R package. A separate model was computed for each edge in the connectivity  
302 adjacency matrix. We took several approaches to test the predictive utility of latent FC for  
303 activation and behavior (detailed below).

304 The first set of analyses tested two alternative measurement approaches for latent FC. The  
305 first was to utilize all available data from each functional scan to estimate factor scores for each  
306 edge. However, because of the differential amount of scan time for different functional runs (e.g.,  
307 ~58 minutes of resting-state versus ~10 minutes of working memory scans), we might expect  
308 indicators (i.e., scan types) with more data would dominate the measurement model in the factor

309 analysis. To control for this potential confound, we ran additional analyses where indicators were  
310 constrained to have equivalent numbers of TRs used to estimate individual scan functional edges  
311 between task and rest, and between different task states. The reasoning task had the fewest “on-  
312 task” TRs (264) and therefore served as the limiting factor for task scans data. As such, 264 TRs  
313 of each task (for 2112 TRs of task) and a corresponding 2112 TRs of rest were used in these  
314 analyses. All of these analyses were performed modeling all available scan types in the same factor  
315 model.

316 For activity flow mapping (ActFlow) analyses (Cole et al., 2016; Ito et al., 2020), where  
317 activations in held-out regions were predicted using estimated activity flowing over estimated  
318 connections, latent FC was estimated independently for each connection by applying leave-one-  
319 state-out factor analysis (LOSO-FA) on the state FC estimates to prevent circularity in the  
320 predictive model. For instance, when predicting activation in the emotion task, FC estimates were  
321 obtained without including the emotion task as an indicator in the factor model.

322

323

## Results

### 324 **Factor analysis model of latent connectivity**

325 We ran independent factor analysis models for each connection, estimating the factor  
326 loadings of the latent variable (i.e., latent FC) onto each state. Latent FC captures the shared  
327 variance in FC across all states (see Figure 2). Factor analyses were run using all available data  
328 (i.e., the full time series and all states).

329

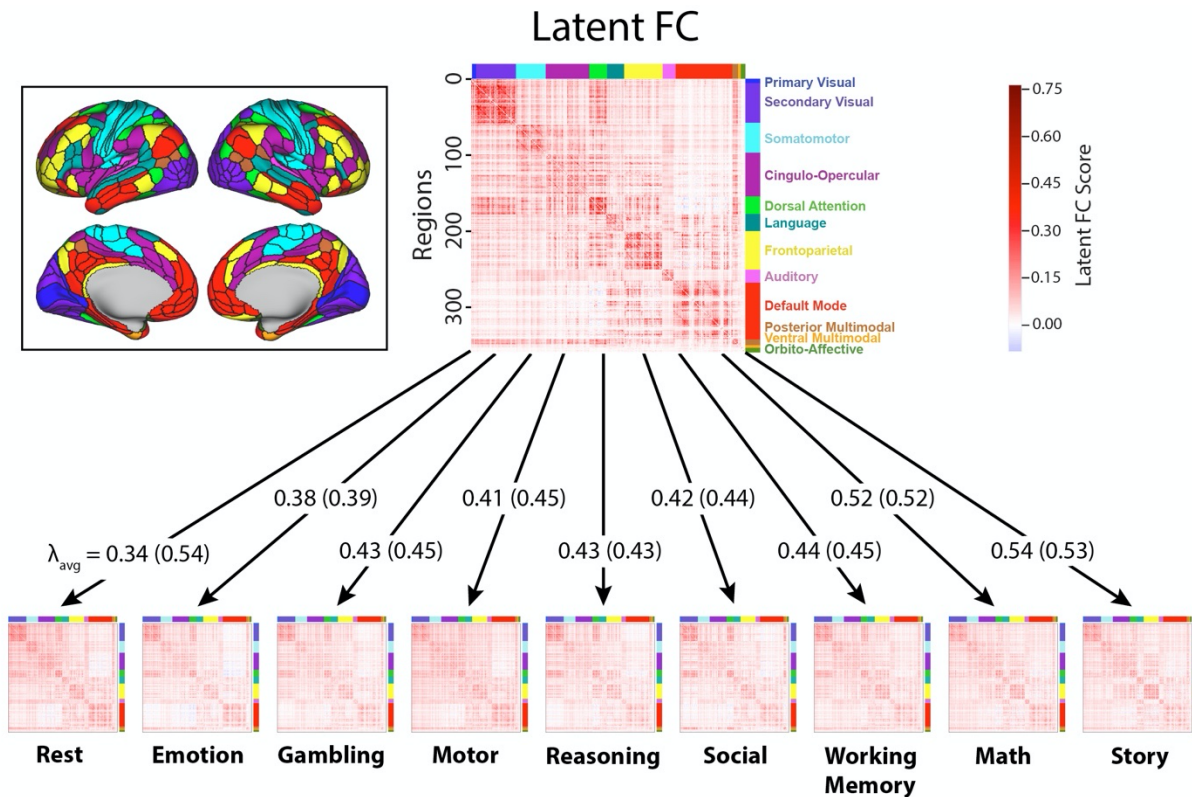

330  
 331 **Figure 2. Factor analysis model of latent FC.** Visualization of the latent connectivity matrix and state-specific  
 332 functional connectivity matrices (group average across subjects). Color along the axes of each matrix corresponds to  
 333 the network membership of each ROI. For each arrow, the average loadings ( $\lambda_{avg}$ ) for each state are shown for  
 334 analyses controlling for number of TRs (first) and when not controlling for TRs (in parentheses). The averaging  
 335 loadings for the task states were largely stable across analyses, but the average loading for resting-state increased  
 336 substantially (from 0.34 to 0.54) when not controlling for the number of TRs. The amount of resting-state data per  
 337 participant went from 4800 TRs (58 minutes) to 2112 TRs (25 minutes) when matching the total amount of “on-task”  
 338 time. The network mapping is shown in the cutout (left). Elements in the state-specific matrices represent correlations  
 339 ( $r$ ) between regional time series and elements in the latent FC matrix represent factor scores computed from the model  
 340 for each connection.

341  
 342 Consistent with our hypothesis that there is a “positive manifold” demonstrating a common  
 343 latent FC architecture across states, almost all factor loadings were positive (greater than 99%)  
 344 across all connections and all states (see Table 1). Furthermore, 70.7% of all factor loadings were  
 345 reasonably large in magnitude (factor loading  $\geq 0.4$ ) and 97.4% of connections had two or more  
 346 states with factor loadings  $\geq 0.4$  in the full latent FC model. The emotion task had the fewest large  
 347 factor loadings (47.3%) and the resting state had the most (92.6%) (see Table 1 for full details).

348 To control for differences between states in the amount of data used to obtain state-specific  
 349 FC estimates, factor analyses were re-run while matching the number of time points from rest and

350 task data (2112 TRs from rest and 264 TRs for each of the 8 tasks). With this approach, resting  
 351 state had the fewest number of relatively high magnitude factor loadings of all states – only 31.6%  
 352 of resting state connections had factor loadings  $\geq 0.4$ . Thus, resting state had the highest factor  
 353 loadings onto latent FC when a large amount of data was used to estimate resting-state FC, but the  
 354 lowest factor loadings when less data was used. Controlling for the number of time points between  
 355 task and rest led to less pronounced changes in the factor loadings of the other states (see Figure  
 356 2). Note that this drop occurs even though rest continues to have substantially more TRs (8x) than  
 357 any given task state in these analyses.

|                | <b>All Data</b>                       |                                         | <b>Controlling for # Timepoints</b>   |                                         |
|----------------|---------------------------------------|-----------------------------------------|---------------------------------------|-----------------------------------------|
| <b>State</b>   | <b>% Loadings <math>\geq 0</math></b> | <b>% Loadings <math>\geq 0.4</math></b> | <b>% Loadings <math>\geq 0</math></b> | <b>% Loadings <math>\geq 0.4</math></b> |
| Rest           | 99.9%                                 | 92.6%                                   | 99.0%                                 | 31.6%                                   |
| Emotion        | 99.3%                                 | 47.3%                                   | 98.7%                                 | 46.3%                                   |
| Gambling       | 99.6%                                 | 65.0%                                   | 99.1%                                 | 62.2%                                   |
| Motor          | 99.8%                                 | 68.0%                                   | 99.4%                                 | 54.8%                                   |
| Reasoning      | 99.5%                                 | 62.1%                                   | 99.1%                                 | 62.3%                                   |
| Social         | 99.8%                                 | 66.2%                                   | 99.3%                                 | 58.4%                                   |
| Working Memory | 99.7%                                 | 67.0%                                   | 99.2%                                 | 64.9%                                   |
| Math           | 99.9%                                 | 82.4%                                   | 99.6%                                 | 82.4%                                   |
| Language       | 99.9%                                 | 86.0%                                   | 99.7%                                 | 86.3%                                   |

358 **Table 1: Factor Loadings.** Almost all factor loadings were positive regardless of whether all resting state data were  
 359 used (left) or we controlled for the number of time points between task and rest (right). Only resting state showed a  
 360 substantial shift in the percent of factor loadings  $\geq 0.4$  when controlling for the number of timepoints. The amount of  
 361 resting-state data per participant went from 4800 TRs (58 minutes) to 2112 TRs (25 minutes) when matching the total  
 362 amount of “on-task” time.

363

### 364 **Latent FC improves generalization to connectivity of held-out states**

365 We next sought to test our second hypothesis: A more reliable and generalizable measure  
 366 of “intrinsic” connectivity can be estimated by combining information across task states, such as



367 in the factor model, than by using resting state data alone (the current field standard). To test  
368 whether the measures of intrinsic FC persist across brain states, we quantified the  
369 generalizability of rest FC and latent FC to held-out brain states. To calculate the similarity of  
370 FC patterns (i.e., across 64,620 network connections), we computed the Pearson's correlation of  
371 rest FC or latent FC with state FC for each individual subject, applying Bonferroni correction to  
372 correct for multiple comparisons. For latent FC, similarity was always computed for the state that  
373 was held-out while running the factor analysis model. Compared to rest FC, we found that latent  
374 FC exhibited significantly greater similarity with a variety of independent brain states (see  
375 Figure 3A). Similarity of each state with latent FC was comparable across states, exhibiting the  
376 greatest similarity to the WM task ( $r = 0.71$ ) and the least similarity to the social task ( $r = 0.66$ )  
377 and resting state ( $r = 0.65$ ). Rest FC exhibited the greatest similarity to resting state ( $r = 0.73$ ),  
378 providing a measure of test-retest similarity of rest FC. For the task states, rest FC had the  
379 greatest similarity to the motor task ( $r = 0.61$ ) and the least similarity to the relational task ( $r =$   
380  $0.56$ ).

381 When using the full timeseries (i.e., not controlling for the amount of data used to obtain the FC  
382 estimates across states), we still found greater similarity of latent FC relative to rest FC with the  
383 task states. However, latent FC exhibited the greatest similarity to the resting state ( $r = 0.80$ ) and  
384 the least similarity to the social task ( $r = 0.67$ ; see Figure 3B). Alongside greater similarity  
385 estimates with all states, this suggests that states may converge towards latent FC as we sample  
386 substantially more data for any given state (e.g., for resting-state FC, 26 minutes of data per  
387 participant were included in the data-restricted analysis vs. 58 minutes of data in the unrestricted  
388 analysis). All findings were replicated in the validation dataset (Figure S1).

389

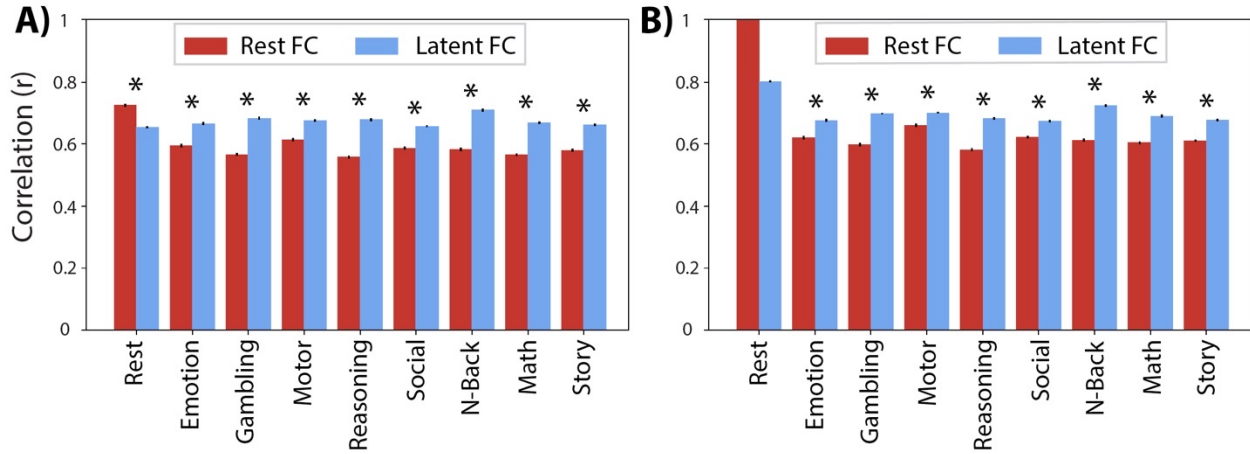

390

391 **Figure 3. Generalizability of FC patterns.** Pearson's correlation was used to quantify the similarity of latent FC  
392 (blue) and rest FC (red) to held-out state FC. Error bars show the standard error of the mean. Asterisks indicate  
393 significant differences in similarity of latent FC and rest FC to held-out state FC. **A)** Results when controlling for the  
394 number of time points in the resting state data. This included 25 minutes of resting-state fMRI data, matching the total  
395 amount of "on-task" time across all tasks. **B)** Results when not controlling for the number of time points (including  
396 58 minutes of resting-state data); the resting state prediction is therefore a perfect reproduction (no error bars or  
397 comparison). These results are consistent with resting-state FC overfitting to resting state, reducing its  
398 generalizability relative to latent FC.

399

#### 400 **Latent FC improves prediction of task activation patterns**

401 We next sought to further test our hypothesis that latent FC is highly generalizable (relative

402 to resting-state FC), this time by testing for generalization beyond FC to patterns of task-evoked

403 activation. We began by using GLMs to estimate the pattern of task-evoked activation for each of

404 24 task conditions. We then used activity flow mapping (Figure. 4A) to predict the pattern of task-

405 evoked activation based on a simple neural network model parameterized using either resting-state

406 FC or latent FC. We used Pearson's correlation to compute the similarity of predicted-to-actual

407 task activations of two activity flow models with different connectivity estimates based on either

408 latent FC or rest FC. As a global measure of performance, we first correlated the predicted

409 activation patterns from the activity flow model using rest and latent FC with the observed

410 activations. Predicted activation patterns from activity flow models with connectivity based on

411 latent FC ( $r = 0.66$ ) outperformed predictions based on resting state FC ( $r = 0.56$ ) in reproducing

412 the observed beta activation patterns. We then compared the results of the two models at the region

413 (i.e., prediction for a given region across conditions) and condition (i.e., prediction for a given  
414 condition across regions) level.

415 We first estimated predicted beta activations for each region (across conditions) using the  
416 activity flow models. This reflects the changes in activation within each region that are dependent  
417 on the task condition. For each region, we compared the beta activation predictions of the two  
418 activity flow models. For each network, we computed the percent of regions with significantly  
419 improved predictions for one of the two models. When using the activity flow model based on  
420 latent FC, the predictions were significantly improved for 68% of brain regions (246 out of 360  
421 total), accounting for 33% of VIS1, 69% of VIS2, 64% of SMN, 73% of CON, 70% of DAN, 62%  
422 of LAN, 62% of FPN, 100% of AUD, 78% of DMN, 14% of PMM, 0% of VMM, and 33% of  
423 ORA. Activity flow based on rest FC significantly improved predictions in 1% of brain regions (4  
424 out of 360 total), accounting for 7% of VIS2 and no other networks (Figure 4B).

425 When considering prediction accuracy for each task condition, we found that latent FC  
426 significantly improved the across-region predicted activations for all task conditions – except the  
427 left-hand condition of the motor task – when comparing the relative activations across the topology  
428 of the brain within a condition (Figure 4C). Overlap of predicted-to-actual task activations for the  
429 activity flow models were variable by task condition. The activity flow model based on latent FC  
430 exhibited the greatest similarity to the 2-back body condition of the WM task ( $r = 0.76$ ) and the  
431 least similarity to the math condition of the language task ( $r = 0.45$ ). The activity flow model based  
432 on rest FC exhibited the greatest similarity to the matching condition of the relational task ( $r =$   
433  $0.67$ ) and the least similarity to the math condition of the language task ( $r = 0.4$ ). All findings were  
434 replicated in the validation dataset (Figure S2).

435

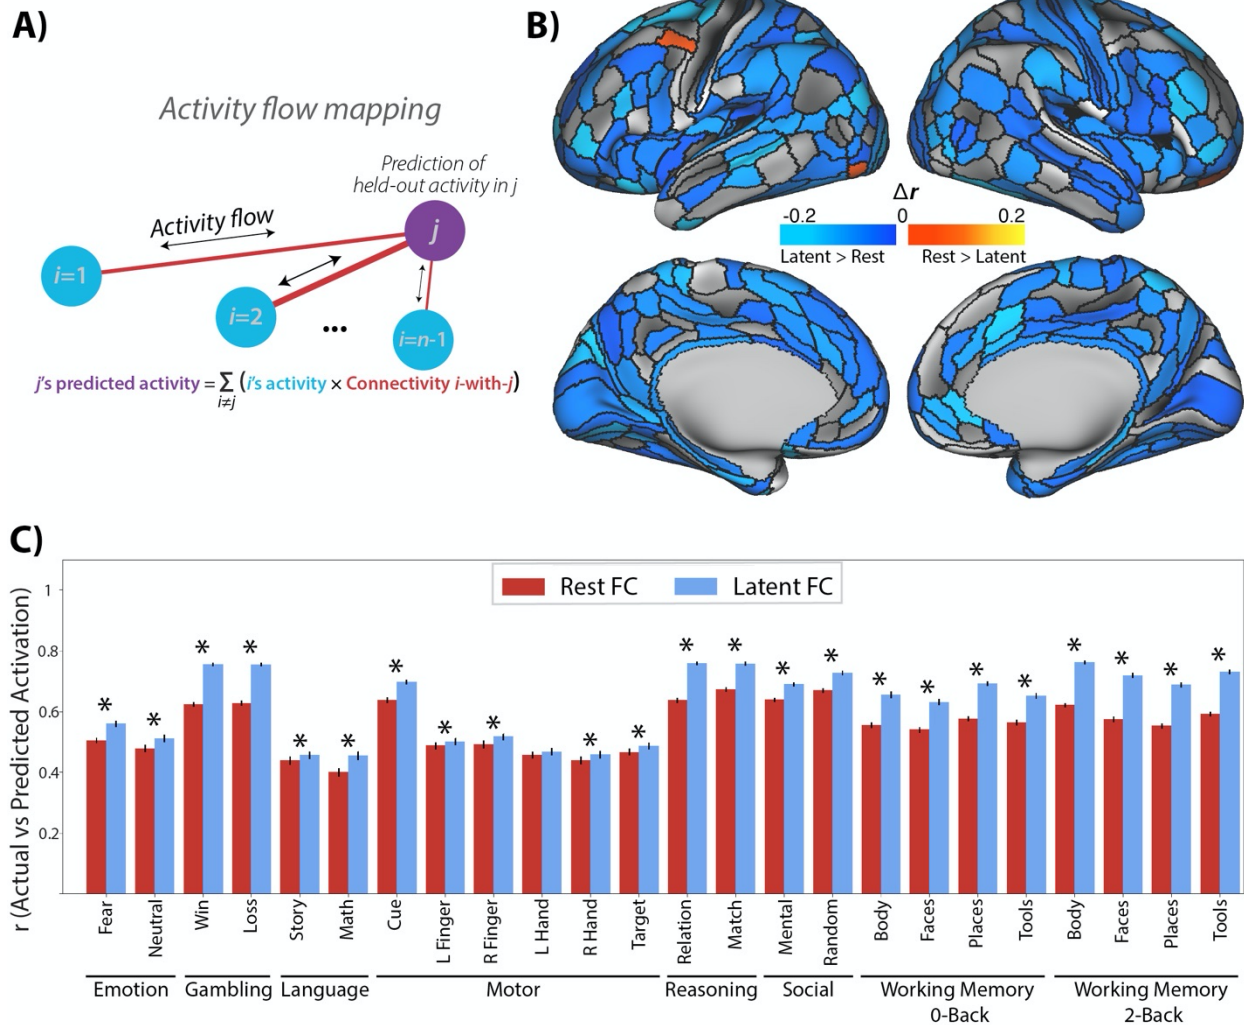

436  
 437 **Figure 4. Comparison of activity flow models based on latent FC versus rest FC.** **A)** Conceptual model of the activity  
 438 flow mapping algorithm (Cole et al., 2016) which models the activity of a held-out region ( $j$ ) as the sum of activity in  
 439 other brain regions ( $i$ ) weighted by their shared functional connectivity ( $ij$ ). **B)** Task activation prediction accuracies  
 440 by region. Regions with prediction accuracies that were significantly greater using the activity flow model based on  
 441 latent FC shown in cool colors. Regions with prediction accuracies that were significantly greater using the activity  
 442 flow model based on rest FC shown in warm colors. The vast majority of regions showing a significant difference  
 443 showed prediction advantages for latent FC. **C)** Task activation prediction accuracies by condition. Pearson's  
 444 correlation was used to quantify the similarity of predicted-to-actual task activations using activity flow models with  
 445 connectivity based on either rest FC (red) or latent FC (blue). Error bars show the standard error of the mean  
 446 correlation. Asterisks indicate significant differences in similarity of beta activations from models based on latent FC  
 447 versus rest FC.

448

#### 449 Latent FC improves prediction of general intelligence

450 Our hypothesis that latent FC generalizes better than resting-state FC also predicts that  
 451 latent FC should be more related to general cognition and behavior, even behavior independent of

452 the particular tasks used for estimating the task-state FC going into the latent FC estimates. We  
453 tested whether latent FC improves prediction of general intelligence using psychometric  $g$  to  
454 capture many different behavioral and cognitive measures (Dubois, Galdi, Paul, & Adolphs, 2018;  
455 Gottfredson, 1997). We estimated general intelligence (psychometric  $g$ ) using a factor analysis  
456 model on behavioral data from a range of cognitive tasks, then tested whether latent FC and/or rest  
457 FC measures could predict general intelligence. We combined the exploration and validation  
458 samples to increase the number of participants to 352 for this analysis, given the need for additional  
459 participants (relative to the other analyses in this study) to achieve reasonable statistical power for  
460 individual difference correlations (Yarkoni, 2009). We employed multiple linear regression to  
461 predict general intelligence from FC, implementing a leave-one-subject-out cross-validation  
462 approach to avoid analysis circularity (Dubois et al., 2018).

463 We found that predicted general intelligence was significantly correlated with actual  
464 general intelligence for models using both rest FC ( $r = 0.33, p = 3.19e-10$ ) and latent FC ( $r = 0.45,$   
465  $p = 1.28e-18$ ) (Figure 5A). Consistent with our hypothesis, the model using latent FC significantly  
466 improved prediction of general intelligence compared to the model using rest FC ( $\Delta r = 0.12, t =$   
467  $2.33, p = 0.01$ , see Eid et al., 2011 for correlation comparison method). The magnitude of this  
468 effect was large, as the percent linear variance explained by latent FC ( $r^2 = 0.200$ ) was almost two  
469 times the percent linear variance explained by rest FC ( $r^2 = 0.107$ ). In comparison with the overall  
470 sample results, the correlation and difference in  $R^2$  was substantially larger for the exploratory  
471 sample (Figure 5B) while the validation set showed a more-similar difference in  $R^2$  despite lower  
472 correlations between predicted and actual psychometric  $g$  scores for both latent and rest FC data  
473 (Figure 5C). A meta-analysis of the exploratory and validation samples suggested that the pooled  
474 correlation difference effect was significant ( $\Delta z_{\text{pooled}} = 0.19, p < 0.001$ )

475

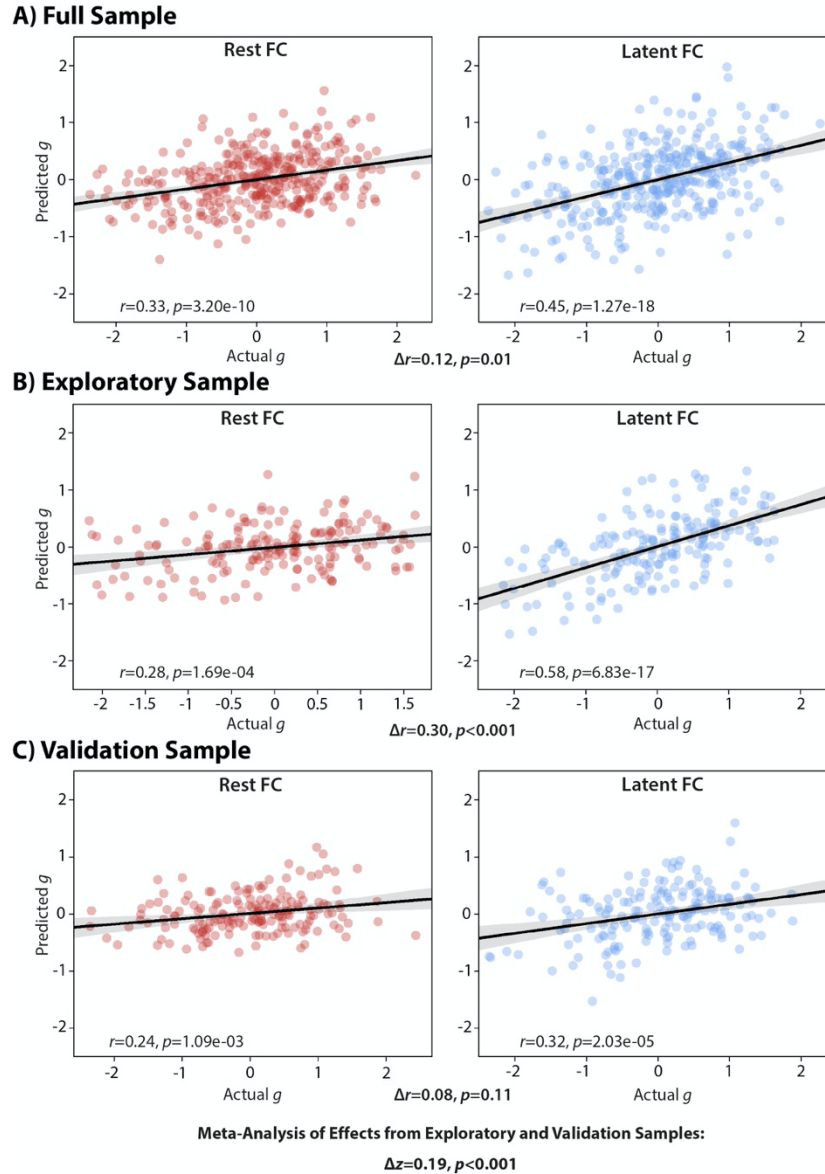

476

477 **Figure 5. Relationship between actual and predicted general intelligence.** Results of multiple linear regression  
478 models from rest FC and latent FC in the **A)** overall, **B)** exploratory, and **C)** validation sample. The significance of  
479 the difference in correlation ( $\Delta r$ ) is indicated below each plot. A meta-analysis of the exploratory and validation  
480 samples showed a significant difference in the correlations between actual and predicted  $g$  scores when comparing  
481 rest to latent FC ( $\Delta z = 0.19, p < 0.001$ ).

482

### 483 Comparing latent and average FC

484 While the factor model uses the covariance among the different states to compute optimal

485 weights, a simpler approach to finding consensus among states involves taking a simple average

486 across states. This approach assumes the weights/loadings between measured states are equal.  
487 Given that the computed weights in our results with latent FC were relatively uniform across states,  
488 we determined that this assumption was reasonable in this case. This supports the use of average  
489 FC, however we directly compared latent FC to average FC to assess whether there were any  
490 advantages to either method. To compare the factor model with a simple average, we computed  
491 the mean value of each edge across states to construct an average connectivity matrix. For all  
492 analyses, we controlled for the amount of data between rest and task. Results indicated that  
493 combining across states, regardless of the approach, shows substantial improvements over using  
494 even the full resting state data. Indeed, the average FC approach appears to out-perform the latent  
495 FC approach (albeit only slightly) in generalizing to held-out connectivity states (Figure 6A). In  
496 the activity flow mapping results, however, latent FC consistently outperforms average FC in  
497 predicting regional activity patterns, showing better predictions in 348 out of 360 regions (97%),  
498 whereas average FC showed no improved predictions (Figure 6B). Similarly, latent FC  
499 outperformed average FC in condition-wise activity flow predictions in 22 out of 24 conditions  
500 (Figure 6C). Together these results suggest that the average FC approach (sometimes termed  
501 “general functional connectivity”) is a reasonable alternative to the more complex latent FC  
502 approach, so long as the optimal weights across states are close to equal (an assumption not made  
503 by latent FC). This difference between the methods would likely become more meaningful in cases  
504 wherein a particular brain state is highly distinct from all others (e.g., deep sleep vs. conscious  
505 states) or when one or more states is much noisier than the others (which would be weighted lower  
506 by latent FC but not average FC).  
507

### A) Generalizing Connectivity

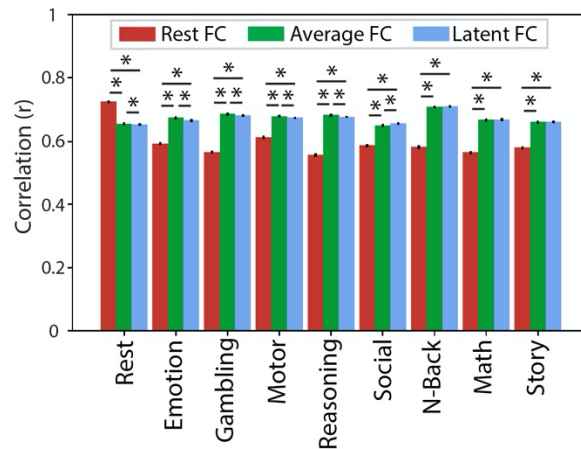

### B) Activity Flow Predictions: by region

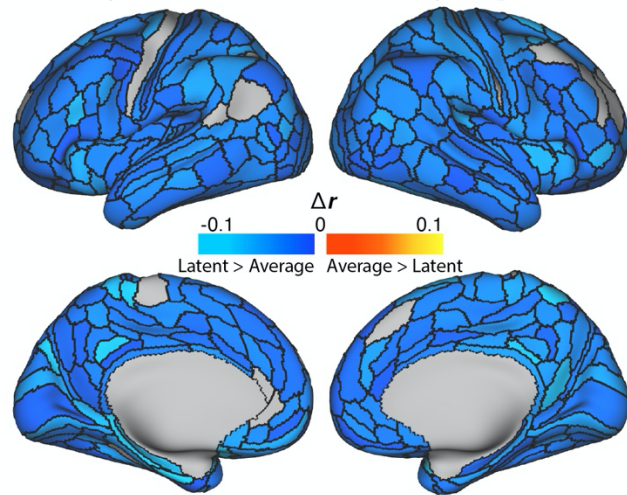

### C) Activity Flow Predictions: by condition

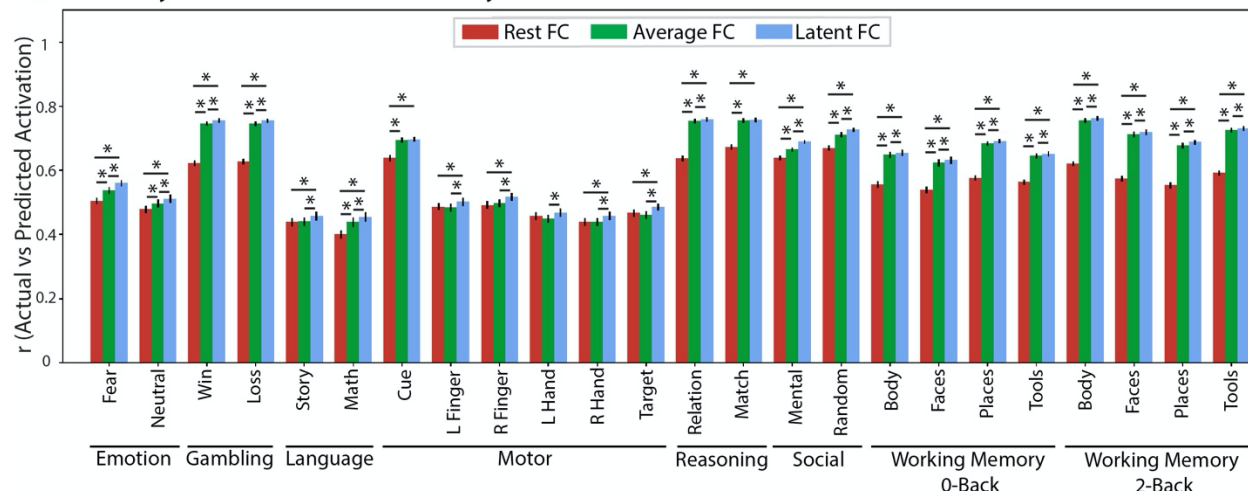

508  
509  
510  
511  
512  
513  
514  
515  
516  
517  
518

**Figure 6. Comparison of A) Generalizing connectivity and B) Activity flow models by region and C) condition, based on latent FC and average FC versus Rest.** **A)** Both average (green) and latent (blue) FC outperformed rest FC on generalizing to all task states except resting state. Average FC performed similarly or slightly better than latent FC on all held-out states (asterisks denote significant differences, the higher position represents the test of rest vs latent FC). **B)** In contrast, latent FC outperformed average FC in predicting task activation in 97% of regions, whereas average FC outperformed in 0% regions. **C)** Across all conditions, latent FC was a better predictor than average FC of held-out activations (lower asterisks indicate significant difference between adjacent bars; higher asterisks indicate significant difference between latent and rest FC). All results control for the number of time points in the resting state data.

519

## Discussion

520

Defining a map of task-independent, intrinsic functional connections in the brain is a major

521

aim of basic research in cognitive neuroscience. Intrinsic FC persists across task states, making it

522

a more reliable and generalizable measure of the underlying functional dynamics that shape



523 cognition and behavior. As such, measures of intrinsic FC are better candidates to serve as stable  
524 biomarkers of important individual differences in behavioral outcomes (M. Elliott et al., 2019).  
525 We utilized a factor analytic approach, a well-developed technique from measurement  
526 psychometrics (Bollen, 2002), to define intrinsic FC as a latent variable derived from the common  
527 variances in FC across task states. We compared the factor model against the standard approach  
528 applied in the field, FC derived from resting state. The factor model not only shows enhanced  
529 measurement and predictive properties beyond measures of intrinsic FC derived from resting state,  
530 it also offers a unique theoretical perspective on the relationship between intrinsic and task-specific  
531 brain states. In a latent variable model, individual task states are viewed as observable sample  
532 realizations of the underlying intrinsic connectivity, and task-specific deviations from this baseline  
533 are modeled as unique errors arising from a combination of noise and state-specific properties. The  
534 factor modeling approach allows researchers to not only gain traction in defining intrinsic FC  
535 common among brain states, but also to separate and explore properties that are specific to  
536 individuals and states.

### 537 **Factor Analytic Model of Functional Connectivity**

538 We began by building factor analysis models of latent FC using two approaches. In the  
539 first, we modeled latent FC using all available data. In this model, resting state functional  
540 connections had the highest number of significant loadings of any condition. However, when  
541 controlling for the number of time-points (by reducing the number of resting state timepoints to  
542 match the tasks with shorter durations), resting state connections had the lowest percentage of  
543 significant factor loadings. This property of the factor model highlights one of its strengths; higher  
544 precision measurements show higher fidelity to the underlying common latent factor than lower-  
545 precision measures. Here, the precision appears to be driven primarily by the amount of data.

546 However, in the absence of stringent data quality control, the factor model can also down-weight  
547 poor-quality data (e.g., high motion, artifacts) relative to higher-quality data when variability  
548 associated with noise does not replicate across task states.

549 Conversely, tasks that more closely represent underlying intrinsic FC will show stronger  
550 factor loadings, similar to how the Raven's Progressive Matrices task loads highly onto the  
551 generalized intelligence factor (Dubois et al., 2018). Given its widespread use as a marker of  
552 intrinsic FC, we might have expected that resting state would load highly onto the latent FC factor  
553 regardless of how much data went into its estimation. However, when controlling for the amount  
554 of data used to estimate FC, the resting state loadings were lower than all other examined states,  
555 even though there were still many more TRs of resting state than any one task state. Additionally,  
556 when using the full amount of data to estimate rest FC, the factor loadings for resting state was  
557 similar to the story and math tasks, each of which were estimated with much less data (Figure 2;  
558 values in parentheses). These results suggest that resting state is not an especially good proxy for  
559 intrinsic FC, which aligns with its relatively poor performance compared with latent FC in  
560 predicting the patterns of connectivity and evoked brain activity observed for other states.

### 561 **Latent FC as a Reliable Measure of Intrinsic Connectivity**

562 As mentioned previously, a marker of intrinsic connectivity is its persistence across task  
563 states (i.e., generalizability), as well as its ability to accurately recapitulate observed realizations  
564 of evoked brain activity and connectivity (M. Elliott et al., 2019; M. L. Elliott et al., 2020; Kragel,  
565 Han, Kraynak, Gianaros, & Wager, 2020; Parkes, Satterthwaite, & Bassett, 2020). Our results  
566 highlight the advantages of latent versus rest FC to reliably predict independent connectivity and  
567 regional activations. When comparing patterns of connectivity, we showed that latent FC showed  
568 higher correlation with held-out, task-specific connectivity states compared with rest FC, with the

569 sole exception of resting state connectivity where rest FC outperformed. This pattern of results  
570 suggests that resting state FC is less generalizable as a measure of intrinsic connectivity and instead  
571 there are resting state-specific factors which shape the dynamics of rest FC that are not present in  
572 other states.

573 One potential explanation for this might be that tasks as a group reliably differ from rest FC's more  
574 intrinsic profile, and the reduction in generalizability reflects deviations from a default state. Under  
575 this explanation, the latent FC advantage could simply reflect that there are more task indicators  
576 in the measurement model than rest (although note that even when controlling for number of  
577 timepoints, the amount of rest data is equal to all the tasks combined) and we would predict that  
578 latent FC would be a poorer representation of rest FC patterns of connectivity. However, results  
579 did not show a substantial drop in the correlation of latent and rest FC compared to the correlations  
580 of latent FC with the various task FC patterns (blue bars, Figure 3). Indeed, it is rest FC that shows  
581 a drop in performance in its correlations with resting state versus task connectivity, suggesting that  
582 latent FC does a better job of representing common, stable variability in FC profiles across both  
583 rest and task states. Importantly, latent FC does so even though the task or rest condition being  
584 correlated is left out of the factor model for that specific comparison to avoid circularity. As such,  
585 the factor score analytically has different indicators across all comparisons, and nevertheless still  
586 outperforms rest FC. Moreover, obtaining a better sample of the resting state by using the full time  
587 series resulted in the resting state having the highest factor loadings and a strongest correlation  
588 with latent FC, which suggests that over time the resting state converges to latent FC.

589

590           The advantages of latent FC are not, however, restricted to the connectivity space; the latent  
591 measure of intrinsic FC also outperforms rest FC in predicting state-specific activation patterns.  
592 Not only did latent FC support higher prediction accuracy by the activity flow model of task  
593 activation globally ( $r_{latent} = 0.66$  vs.  $r_{rest} = 0.56$ ), it showed condition-specific advantages in 23 out  
594 of 24 specific task conditions (Figure 4B). Rest FC, in comparison, displayed higher prediction  
595 accuracy in none of the task conditions (in the left-hand motor condition, latent and rest FC  
596 performed comparably; Figure 4C). When we examined predictions of region-specific patterns of  
597 activation, results showed that latent FC had improved prediction over rest FC for 68% of all brain  
598 regions across a variety of distributed networks. In contrast, rest FC showed improved prediction  
599 for only 1.1% of regions, all of which were restricted to the VIS2 network (and constituted only  
600 7% of that network). These improvements, as before, were not due to circularity in the analyses,  
601 as task predictions using latent FC were done using the leave-one-task-out approach in the factor  
602 model.

### 603 **Improving External Validity with Latent FC**

604           While latent FC has demonstrable advantages for prediction within the brain, its utility as  
605 a method of estimating brain-based biomarkers relies on its predictive validity for outcomes of  
606 interest. Here, we showed that connectivity values from latent FC showed superior prediction of a  
607 metric of generalized intelligence (psychometric  $g$ ) than did rest FC connections. Although both  
608 rest FC and latent FC values significantly predicted individual differences in generalized  
609 intelligence, latent FC doubled the percent of explained variance in the outcome over rest FC (20%  
610 versus 10%). In measurement science, this is a hallmark advantage of the latent variable approach  
611 used in factor analysis. Methods which fail to account for measurement error tend to show reduced  
612 relationships between variables, whereas modeling state-specific error terms dis-attenuates those

613 relationships (Schmidt & Hunter, 1996). Indeed, generalized intelligence is generally modeled  
614 with a factor analytic approach for precisely this reason. We demonstrate that the framework for  
615 improving measurement properties in behavioral measures applies equally to measures derived  
616 from functional neuroimaging data. As such, factor analytic models are ideal for aiding the search  
617 for biomarkers across a wide domain of individual difference outcomes.

### 618 **State Aggregation Improves Predictive Performance**

619 The performance of average FC suggests that aggregating information across states has  
620 advantages over longer scan sessions of resting state, regardless of the approach used.  
621 Interestingly, average FC performance is not uniform in relation to the latent FC, performing as-  
622 good or slightly better than latent FC in correlating with state-specific connectivity, but  
623 underperforming latent FC in predicting held out activity in almost all regions. A few  
624 circumstances may predict when we would expect to see more or less pronounced differences  
625 between average and latent FC. First, data quality: We expect more pronounced differences for  
626 lower quality data and less pronounced differences for higher quality data. The HCP data used  
627 here is of extremely high quality, which reduces variability in noise between scans. This is  
628 reflected in the average factor loadings which are relatively close in value across states (Figure 2).  
629 Of course, as the loadings converge in value, the more similar average and latent FC will become  
630 (here the connectivity values are correlated;  $r = .98$ ). Second, the method of factor analysis used:  
631 Here, we opted to fit a single-factor model for each connection independently due to the large  
632 number of operations (e.g., separate models for each connection). However, a single factor in  
633 isolation may not be the best fit for brain data (van Kesteren & Kievit, 2020) and the method here  
634 might represent a sort of floor performance for latent FC relative to approaches which adopt a  
635 dependent model that tries to optimize the fit for each factor model.

636 Finally, there appear to be differences depending on the type of dependent variable in  
637 question. For example, while the factor and average models converge in their correlation with  
638 connectivity for held-out states, we found that activity flow models that incorporated latent FC  
639 performed better. Average and factor models produced similar patterns of relative connectivity  
640 (i.e., highly correlated patterns of FC), however the distribution of connectivity values differ.  
641 Latent FC estimates exhibited a sparser distribution of connectivity by zero-ing out low and/or  
642 unstable connections, which may have improved the activity flow models by reducing the  
643 contributions of disconnected brain regions (see Figure S4).

644 Despite the relatively small differences in performance between average and latent FC,  
645 there are theoretical reasons to prefer a latent variable perspective for FC estimation. The first, as  
646 mentioned before, is that while the average FC must assume equal loadings, latent FC makes this  
647 a testable hypothesis. If loadings converge towards equal values, then average and latent FC will  
648 converge (as they nearly did here). This suggests that averaging will likely perform well under  
649 conditions similar to the HCP data (high quality, young adult data). However, as the data diverges  
650 from this baseline, latent FC should have advantages by weighting data according to how closely  
651 it reflects intrinsic functional states and contributes to the common variance across measures. If  
652 differences among measures increase (i.e., measures reflect intrinsic FC better or worse), we would  
653 hypothesize that average and latent FC would diverge in their performance. However, apart from  
654 these practical considerations, a latent variable model of FC is a good theoretical model for how  
655 state-specific functional connections emerge from underlying, intrinsic neural connectivity.  
656 Intrinsic connectivity is an unobserved state (Bollen, 2002) that gives rise to state specific  
657 phenotypes based on combinations of common (i.e., the latent factor) and state-specific (i.e., the  
658 error) variance.

## 659 **Conclusions**

660           In summary, we utilized a factor analytic approach to derive intrinsic FC from multiple  
661 task and resting state data. Our derived measure, termed latent FC, showed improved  
662 generalizability and reliability compared to a standard measure of resting-state FC. Not only did  
663 latent FC do a better job of reflecting state-specific FC patterns across tasks, it also  
664 overwhelmingly improved predictions of regional activations when utilized in activity flow  
665 models. Finally, connectivity derived from latent FC doubled the predictive utility of an external  
666 measure of generalized intelligence (g) compared with connectivity from rest FC, highlighting its  
667 suitability for use in clinical and other individual difference research, where reliable biomarkers  
668 are needed. These results present compelling support for the use of factor analytic models in  
669 cognitive neuroscience, demonstrating the value of established tools from psychometrics for  
670 enhancing measurement quality in neuroscience.

671

672

673 **Acknowledgements**

674 The authors acknowledge support by the US National Institutes of Health under awards R01  
675 AG055556 and R01 MH109520 to MWC. Data were provided by the Human Connectome  
676 Project, WU-Minn Consortium (Principal Investigators: D. Van Essen and K. Ugurbil;  
677 1U54MH091657) funded by the 16 NIH Institutes and Centers that support the NIH Blueprint  
678 for Neuroscience Research; and by the McDonnell Center for Systems Neuroscience at  
679 Washington University. The content is solely the responsibility of the authors and does not  
680 necessarily represent the official views of any of the funding agencies. The authors acknowledge  
681 the Office of Advanced Research Computing (OARC) at Rutgers, The State University of New  
682 Jersey for providing access to the Amarel cluster and associated research computing resources  
683 that have contributed to the results reported here.

684

685 **Author contributions**

686 KLA and MWC designed the analytic approach. EMM and KLA carried out analyses with  
687 MWC. EMM, KLA, and MWC wrote the manuscript, with feedback received from all other  
688 authors.

689

690 **Conflict of interest**

691 The authors declare no competing financial interests.



692

## References

- 693 Anderson, J. S., Ferguson, M. A., Lopez-Larson, M., & Yurgelun-Todd, D. (2011).  
694       Reproducibility of single-subject functional connectivity measurements. *AJNR. American*  
695       *Journal of Neuroradiology*, 32(3), 548–555.
- 696 Barch, D. M., Burgess, G. C., Harms, M. P., Petersen, S. E., Schlaggar, B. L., Corbetta, M., ...  
697       WU-Minn HCP Consortium. (2013). Function in the human connectome: task-fMRI and  
698       individual differences in behavior. *NeuroImage*, 80, 169–189.
- 699 Behzadi, Y., Restom, K., Liau, J., & Liu, T. T. (2007). A component based noise correction  
700       method (CompCor) for BOLD and perfusion based fMRI. *NeuroImage*, 37(1), 90–101.
- 701 Bollen, K. A. (2002). Latent variables in psychology and the social sciences. *Annual Review of*  
702       *Psychology*, 53, 605–634.
- 703 Ciric, R., Wolf, D. H., Power, J. D., Roalf, D. R., Baum, G. L., Ruparel, K., ... Satterthwaite, T.  
704       D. (2017). Benchmarking of participant-level confound regression strategies for the

705 control of motion artifact in studies of functional connectivity. *NeuroImage*, *154*, 174–  
706 187.

707 Cohen, M. R., & Kohn, A. (2011). Measuring and interpreting neuronal correlations. *Nature*  
708 *Neuroscience*, *14*(7), 811–819.

709 Cole, M. W., Bassett, D. S., Power, J. D., Braver, T. S., & Petersen, S. E. (2014). Intrinsic and  
710 task-evoked network architectures of the human brain. *Neuron*, *83*(1), 238–251.

711 Cole, M. W., Ito, T., Bassett, D. S., & Schultz, D. H. (2016). Activity flow over resting-state  
712 networks shapes cognitive task activations. *Nature Neuroscience*, *19*(12), 1718–1726.

713 Cole, M. W., Ito, T., Schultz, D., Mill, R., Chen, R., & Cocuzza, C. (2019). Task activations  
714 produce spurious but systematic inflation of task functional connectivity estimates.  
715 *NeuroImage*, *189*, 1–18.

716 Dubois, J., Galdi, P., Paul, L. K., & Adolphs, R. (2018). A distributed brain network predicts  
717 general intelligence from resting-state human neuroimaging data. *Philosophical*  
718 *Transactions of the Royal Society of London. Series B, Biological Sciences*, *373*(1756).  
719 doi:10.1098/rstb.2017.0284

720 Elliott, M., Knodt, A., Cooke, M., Kim, J., Melzer, T., Keenan, R., ... Hariri, A. (2019). S7.  
721 General functional connectivity: Shared features of resting state and task fMRI drive  
722 reliable and heritable individual differences in functional brain networks. *Biological*  
723 *Psychiatry*, *85*(10), S299.

724 Elliott, M. L., Knodt, A. R., Ireland, D., Morris, M. L., Poulton, R., Ramrakha, S., ... Hariri, A.  
725 R. (2020). What Is the Test-Retest Reliability of Common Task-Functional MRI

- 726 Measures? New Empirical Evidence and a Meta-Analysis. *Psychological Science*, 31(7),  
727 792–806.
- 728 Fox, M. D., & Raichle, M. E. (2007). Spontaneous fluctuations in brain activity observed with  
729 functional magnetic resonance imaging. *Nature Reviews. Neuroscience*, 8(9), 700–711.
- 730 Friston, K. J., Holmes, A. P., Worsley, K. J., Poline, J.-P., Frith, C. D., & Frackowiak, R. S. J.  
731 (1994). Statistical parametric maps in functional imaging: A general linear approach.  
732 *Human Brain Mapping*, 2(4), 189–210.
- 733 Gershon, R. C., Wagster, M. V., Hendrie, H. C., Fox, N. A., Cook, K. F., & Nowinski, C. J.  
734 (2013). NIH Toolbox for Assessment of Neurological and Behavioral Function.  
735 *Neurology*, 80(11 Supplement 3), S2–S6.
- 736 Glasser, M. F., Coalson, T. S., Bijsterbosch, J. D., Harrison, S. J., Harms, M. P., Anticevic, A.,  
737 ... Smith, S. M. (2018). Using temporal ICA to selectively remove global noise while  
738 preserving global signal in functional MRI data. *NeuroImage*, 181, 692–717.
- 739 Glasser, M. F., Coalson, T. S., Robinson, E. C., Hacker, C. D., Harwell, J., Yacoub, E., ... Van  
740 Essen, D. C. (2016). A multi-modal parcellation of human cerebral cortex. *Nature*,  
741 536(7615), 171–178.
- 742 Gottfredson, L. S. (1997). Mainstream science on intelligence: An editorial with 52 signatories,  
743 history, and bibliography. *Intelligence*, 24(1), 13–23.
- 744 Gratton, C., Laumann, T. O., Nielsen, A. N., Greene, D. J., Gordon, E. M., Gilmore, A. W., ...  
745 Petersen, S. E. (2018). Functional brain networks are dominated by stable group and  
746 individual factors, not cognitive or daily variation. *Neuron*, 98(2), 439-452.e5.
- 747 Gur, R. C., Richard, J., Huggett, P., Calkins, M. E., Macy, L., Bilker, W. B., ... Gur, R. E.  
748 (2010). A cognitive neuroscience-based computerized battery for efficient measurement

749 of individual differences: standardization and initial construct validation. *Journal of*  
750 *Neuroscience Methods*, 187(2), 254–262.

751 Hacker, C. D., Laumann, T. O., Szrama, N. P., Baldassarre, A., Snyder, A. Z., Leuthardt, E. C.,  
752 & Corbetta, M. (2013). Resting state network estimation in individual subjects.  
753 *NeuroImage*, 82, 616–633.

754 Honey, C. J., Sporns, O., Cammoun, L., Gigandet, X., Thiran, J. P., Meuli, R., & Hagmann, P.  
755 (2009). Predicting human resting-state functional connectivity from structural  
756 connectivity. *Proceedings of the National Academy of Sciences of the United States of*  
757 *America*, 106(6), 2035–2040.

758 Ito, T., Brincat, S. L., Siegel, M., Mill, R. D., He, B. J., Miller, E. K., ... Cole, M. W. (2020).  
759 Task-evoked activity quenches neural correlations and variability across cortical areas.  
760 *PLoS Computational Biology*, 16(8), e1007983.

761 Kovacs, K., & Conway, A. R. A. (2016). Process overlap theory: A unified account of the  
762 general factor of intelligence. *Psychological Inquiry*, 27(3), 151–177.

763 Kragel, P. A., Han, X., Kraynak, T. E., Gianaros, P. J., & Wager, T. D., Ph. D. (2020). fMRI can  
764 be highly reliable, but it depends on what you measure. doi:10.31234/osf.io/9eaxk

765 Krienen, F. M., Yeo, B. T. T., & Buckner, R. L. (2014). Reconfigurable task-dependent  
766 functional coupling modes cluster around a core functional architecture. *Philosophical*

- 767            *Transactions of the Royal Society of London. Series B, Biological Sciences*, 369(1653),  
768            20130526.
- 769    Laumann, T. O., Gordon, E. M., Adeyemo, B., Snyder, A. Z., Joo, S. J., Chen, M.-Y., ...  
770            Petersen, S. E. (2015). Functional System and Areal Organization of a Highly Sampled  
771            Individual Human Brain. *Neuron*, 87(3), 657–670.
- 772    McNeish, D., & Wolf, M. G. (2020). Thinking twice about sum scores. *Behavior Research*  
773            *Methods*, 52(6), 2674.
- 774    Murphy, K., Birn, R. M., Handwerker, D. A., Jones, T. B., & Bandettini, P. A. (2009). The  
775            impact of global signal regression on resting state correlations: are anti-correlated  
776            networks introduced? *NeuroImage*, 44(3), 893–905.
- 777    Parkes, L., Satterthwaite, T. D., & Bassett, D. S. (2020). Towards precise resting-state fMRI  
778            biomarkers in psychiatry: synthesizing developments in transdiagnostic research,  
779            dimensional models of psychopathology, and normative neurodevelopment. *Current*  
780            *Opinion in Neurobiology*, 65, 120–128.
- 781    Power, J. D., Mitra, A., Laumann, T. O., Snyder, A. Z., Schlaggar, B. L., & Petersen, S. E.  
782            (2014). Methods to detect, characterize, and remove motion artifact in resting state fMRI.  
783            *NeuroImage*, 84, 320–341.
- 784    Power, J. D., Plitt, M., Gotts, S. J., Kundu, P., Voon, V., Bandettini, P. A., & Martin, A. (2018).  
785            Ridding fMRI data of motion-related influences: Removal of signals with distinct spatial

786 and physical bases in multiecho data. *Proceedings of the National Academy of Sciences*  
787 *of the United States of America*, 115(9), E2105–E2114.

788 Raichle, M. E. (2006). Neuroscience. The brain’s dark energy. *Science (New York, N.Y.)*,  
789 314(5803), 1249–1250.

790 Revelle, W. R. (2017). *psych: Procedures for Personality and Psychological Research*.  
791 Retrieved from [https://www.scholars.northwestern.edu/en/publications/psych-](https://www.scholars.northwestern.edu/en/publications/psych-procedures-for-personality-and-psychological-research)  
792 [procedures-for-personality-and-psychological-research](https://www.scholars.northwestern.edu/en/publications/psych-procedures-for-personality-and-psychological-research)

793 Schmidt, F. L., & Hunter, J. E. (1996). Measurement error in psychological research: Lessons  
794 from 26 research scenarios. *Psychological Methods*, 1(2), 199–223.

795 Smith, S. M., Beckmann, C. F., Andersson, J., Auerbach, E. J., Bijsterbosch, J., Douaud, G., ...  
796 WU-Minn HCP Consortium. (2013). Resting-state fMRI in the Human Connectome  
797 Project. *NeuroImage*, 80, 144–168.

798 Smith, S. M., Fox, P. T., Miller, K. L., Glahn, D. C., Fox, P. M., Mackay, C. E., ... Beckmann,  
799 C. F. (2009). Correspondence of the brain’s functional architecture during activation and

800 rest. *Proceedings of the National Academy of Sciences of the United States of America*,  
801 106(31), 13040–13045.

802 Spearman, C. (1904). “General Intelligence” Objectively Determined and Measured. *The*  
803 *American Journal of Psychology*, 15(2), 201–293.

804 Thurstone, L. L. (1935). *The vectors of mind: Multiple-factor analysis for the isolation of*  
805 *primary traits*. Retrieved from <https://psycnet.apa.org/psycinfo/2004-16228-000/>

806 Van Essen, D. C., Smith, S. M., Barch, D. M., Behrens, T. E. J., Yacoub, E., Ugurbil, K., & WU-  
807 Minn HCP Consortium. (2013). The WU-Minn Human Connectome Project: an  
808 overview. *NeuroImage*, 80, 62–79.

809 van Kesteren, E.-J., & Kievit, R. A. (2020). Exploratory Factor Analysis with Structured  
810 Residuals for Brain Imaging Data (p. 2020.02.06.933689).  
811 doi:10.1101/2020.02.06.933689

812 Wong, C. W., Olafsson, V., Tal, O., & Liu, T. T. (2013). The amplitude of the resting-state fMRI  
813 global signal is related to EEG vigilance measures. *NeuroImage*, 83, 983–990.

814 Yarkoni, T. (2009). Big Correlations in Little Studies: Inflated fMRI Correlations Reflect Low  
815 Statistical Power-Commentary on Vul et al. (2009). *Perspectives on Psychological*  
816 *Science: A Journal of the Association for Psychological Science*, 4(3), 294–298.
